# Supplementary material for: Changes in self-reported cannabis use during the COVID-19 pandemic: a scoping review
Source: Springer Nature journal article supplement (doi:10.1186/s12889-023-17068-7), 2023-11-01
Supplement: MOESM2 [file 12889_2023_17068_MOESM2_ESM.pdf]

## Supplementary Material 2

### SEARCH STRATEGIES

#### Medline Search

1. exp "Marijuana Use"/
2. exp Marijuana Abuse/
3. exp Medical Marijuana/
4. exp Cannabinoids/
5. exp Cannabaceae/
6. (marijuana\$ or marihuana\$).mp.
7. (Hashish\$ or hash\$ or bhang\$ or ganja\$ or ganjah\$ or hemp\$ or charas\$).mp.
8. Cannabi\$.mp.
9. canabi\$.mp.
10. (THC\$ or CBD\$ or AEA).mp.
11. (cannador\$ or eucannabinolide\$ or 8001-45-4 or 8063-14-7 or 38458-58-1 or delta3-thc\$ or delta3thc\$ or delta-9-THC\$ or delta9THC\$ or sp-104 or sp104 or 5957-75-5 or 1972-08-3 or Deltanyne\$ or Dronabinol\$ or Marinol\$ or dronabinolum\$ or ea-1477 or ea1477 or tetranabinex\$ or qcd-84924 or qcd84924 or 7663-50-5 or 9tetrahydrocannabinol\$ or nabidiolex\$ or 13956-29-1 or delta9\$11\$tetrahydrocannabinol\$ or Tetrahydrocannabinol\$ or tetrahydrocannabinol\$ or endocannabinoid\$ or dexanabinol\$ or Hu-210 or Hu-211 or hu210 or hu211 or 112924-45-5 or Nabilone\$ or Cesamet\$ or cesametic\$ or cpd109514 or cpd-109514 or lilly-109514 or lilly109514 or 51022-71-0 or Nabiximols\$ or Sativex\$ or Gw-1000 or gw1000 or sab-378 or sab378 or 56575-23-6 or nantradol\$ or cp-44001 or cp44001 or cp-44001-1 or cp440011 or cp440011 or cp44001-1 or 72028-54-7 or ea-1477 or ea1477 or tetranabinex\$ or qcd-84924 or qcd84924 or 7663-50-5).mp.
12. exp COVID-19/
13. covid\$.mp.
14. nCov\$.mp.
15. ncovid\$.mp.
16. n covid\$.mp.
17. CoV2\$.mp.
18. CoV 2\$.mp.
19. COVID19\$.mp.

20. COVID2019\$.mp.
21. COVID 19\$.mp.
22. COVID 2019\$.mp.
23. (Novel adj3 Coronavirus\$).mp.
24. (Novel adj3 Corona virus\$).mp.
25. (novel adj3 coronaravirus\$).mp.
26. (novel adj3 coronara virus\$).mp.
27. SARS COV 2\$.mp.
28. SARS COV2\$.mp.
29. Severe Acute Respiratory Syndrome Corona\$ 2\$.mp.
30. (coronavirus\$ adj3 disease\$ adj3 2019\$).mp.
31. (coronavirus\$ adj3 disease\$ adj3 19\$).mp.
32. (corona virus\$ adj3 disease\$ 2019).mp.
33. (corona virus\$ adj3 disease\$ 19\$).mp.
34. SARS Corona\$ 2.mp.
35. SARS CoV2\$.mp.
36. Severe Acute Respiratory Syndrome Corona virus\$ 2\$.mp.
37. Severe Acute Respiratory Syndrome CoV 2\$.mp.
38. Severe Acute Respiratory Syndrome CoV2\$.mp.
39. HCoV 19\$.mp.
40. novel cov\$.mp.
41. or/1-10 [cannabis set]
42. or/12-38 [covid-19 set]
43. 41 and 42
44. limit 43 to yr="2020 -Current"

## **Grey Literature Search**

### **Preprint Servers**

bioRxiv

<https://www.biorxiv.org/>

medRxiv

<https://www.medrxiv.org/>

OSF Preprints

<https://osf.io/preprints/>

## **List of Governmental Agencies/ Other Organizations Searched**

### **International**

United Nations Office on Drugs and  
Crime (UNODC)

COVID-19 and the drug supply chain:  
from production and trafficking to use

<https://www.unodc.org/documents/data-and-analysis/covid/Covid-19-and-drug-supply-chain-Mai2020.pdf>

### **Europe**

European Monitoring Centre for Drugs  
and Drug Addiction (EMCDDA)

European Web Survey on Drugs

[https://www.emcdda.europa.eu/news/2022/1/latest-european-web-survey-drugs-finds-cannabis-and-ecstasy-use-most-impacted-covid-19\\_en](https://www.emcdda.europa.eu/news/2022/1/latest-european-web-survey-drugs-finds-cannabis-and-ecstasy-use-most-impacted-covid-19_en)

### **Australia**

National Drug Strategy Household Survey

<https://campaigns.health.gov.au/drughelp/drug-trends-and-statistics>

Impact of the COVID-19 pandemic on cannabis demand and supply in Australia

<https://www.aic.gov.au/publications/sb/sb33>

National Drug & Alcohol Research Centre Medicine ADAPT Study

<https://ndarc.med.unsw.edu.au/resource/key-findings-australians-drug-use-adapting-pandemic-threats-adapt-study>

<https://ndarc.med.unsw.edu.au/resource/key-findings-australians-drug-use-adapting-pandemic-threats-adapt-study-wave-2>

UNSW Social Policy Research Centre

van de Ven, K., Ritter, A., & Stirling, R. (2021). The impact of the COVID-19 pandemic on the non-government alcohol and other drug sector. DPMP Monograph No. 34. Sydney: UNSW Social Policy Research Centre

<http://unsworks.unsw.edu.au/fapi/datastream/unsworks:74035/binaba0ec82-1837-40d4-9570-4ab50ee3217c?view=true&xy=01>

Alcohol and Drug Council of Australia

(ADCA)

<https://aadc.org.au>

Australian National Council on Drugs

(ANCD)

<https://idpc.net/publications>

Drug Policy Modelling Program (DPMP)

<https://ndarc.med.unsw.edu.au/resources>

Australian Drug Trends 2020: Key Findings from the National Illicit Drug Reporting System (IDRS) Interviews

<https://ndarc.med.unsw.edu.au/resource/australian-drug-trends-2020-key-findings-national-illicit-drug-reporting-system-idrs>

Australian Drug Trends 2020: Key Findings from the National Ecstasy and Related Drugs Reporting System (EDRS) Interviews

<https://ndarc.med.unsw.edu.au/resource/australian-drug-trends-2020-key-findings-national-ecstasy-and-related-drugs-reporting>

## **Canada**

Statistics Canada: Cannabis Statistics Hub at <https://www150.statcan.gc.ca/n1/pub/13-610-x/13-610-x2018001-eng.htm>

Statistics Canada

Alcohol and cannabis use during the pandemic: Canadian Perspectives Survey Series

<https://www150.statcan.gc.ca/n1/daily-quotidien/210304/dq210304a-eng.htm>

Health Canada/Statistics Canada

Canadian Alcohol and Drugs Survey

<https://www.canada.ca/en/health-canada/services/canadian-alcohol-drugs-survey.html>

CCSA

COVID-19, Alcohol and Cannabis Use

<https://www.ccsa.ca/covid-19-alcohol-and-cannabis-use-report>

The Mental Health Commission of Canada

Mental Health and Substance Use During COVID-19

[https://www.mentalhealthcommission.ca/wp-content/uploads/drupal/2021-02/mhcc\\_ccsa\\_covid\\_leger\\_poll\\_eng.pdf](https://www.mentalhealthcommission.ca/wp-content/uploads/drupal/2021-02/mhcc_ccsa_covid_leger_poll_eng.pdf)

## **Ireland**

Government of Ireland

Impact of COVID-19 on Drug and Alcohol

Services and People who use Drugs in  
Ireland: A report of survey findings

<https://igees.gov.ie/wp-content/uploads/2021/01/Covid-Rapid-Impact-Assessment.pdf>

DrugNet Ireland

Impact of Covid-19 on drug use in Ireland

[https://www.hrb.ie/fileadmin/2.\\_Plugin\\_related\\_files/Publications/2021\\_publications/2021\\_HIE/Evidence\\_Centre/Drugnet\\_Ireland\\_76.pdf](https://www.hrb.ie/fileadmin/2._Plugin_related_files/Publications/2021_publications/2021_HIE/Evidence_Centre/Drugnet_Ireland_76.pdf)

National Drug and Alcohol Survey (NDAS) 2019-2020

<https://www.hrb.ie/publications/publication/the-2019-20-irish-national-drug-and-alcohol-survey-main-findings/returnPage/1/>

## **New Zealand**

Government of New Zealand, Ministry of Health

Drug Use and Statistics

<https://www.health.govt.nz/nz-health-statistics/health-statistics-and-data-sets/drug-use-data-and-stats>

Drug Foundation

Pulse survey

<https://www.drugfoundation.org.nz/assets/uploads/2020-uploads/Covid-19-resources/Pulse-survey-of-addiction-services-and-people-who-use-drugs-during-alert-level-4.pdf>

Impact of Covid-19 lockdown on youth

Alcohol and other drug (AOD) use : Findings from a survey of AOD services in New Zealand

<https://www.drugfoundation.org.nz/assets/uploads/2020-uploads/Covid-19-impact-on-youth-AOD-use-summary.pdf>

## **United Kingdom**

Government of UK

Collection of Drug Misuse Statistics

<https://www.gov.uk/government/collections/drug-misuse-declared>

Aldridge, J., Garius, L., Spicer, J., Harris, M., Moore, K. & Eastwood, N. (2021) Drugs in the Time of COVID: The UK Drug Market Response to Lockdown

Restrictions, London: Release

<https://www.release.org.uk/sites/default/files/pdf/publications/Release%20COVID%20Survey%20Interim%20Findings%20final.pdf>

Department of Health, Northern Ireland

Statistics from the Northern Ireland Substance Misuse Database: 2019/20

<https://www.health-ni.gov.uk/news/statistics-northern-ireland-substance-misuse-database-201920>

Northern Ireland, Statistics and Research Agency

<https://www.nisra.gov.uk/statistics>

Scottish Schools Adolescent Lifestyle and Substance Use Survey (SALSUS): drug use report 2018

<https://www.gov.scot/publications/scottish-schools-adolescent-lifestyle-substance-use-survey-salsus-drug-use-report-2018/>

Government of Scotland

COVID-19 impact on drug related abuse in Scotland

<https://www.gov.scot/publications/foi-202100174213/>

ScotPHO

Drug Misuse

<https://www.scotpho.org.uk/behaviour/drugs/data/availability-and-prevalence>

**USA**

CDC

Behavioural Risk Factor Surveillance System (BRFSS)

<https://www.cdc.gov/chronicdisease/resources/publications/factsheets/brfss.htm>

Youth Risk Behavior Surveillance System (YRBSS)

<https://www.cdc.gov/healthyyouth/data/yrbs/index.htm>

National Health and Nutrition Examination Survey

<https://www.cdc.gov/nchs/nhanes/index.htm>

NIDA

Community Epidemiology Work Group

(CEWG) (part of the National Institute

on Drug Abuse - NIDA)

<https://nida.nih.gov/about-nida/organization/divisions/division-epidemiology-services-prevention-research-despr/community-epidemiology-work-group-cewg>

Monitoring the Future

<https://nida.nih.gov/drug-topics/trends-statistics/monitoring-future>

US Department of Transportation, NHTSA

Drug and Alcohol Prevalence in Seriously and Fatally Injured Road Users Before and During the COVID-19 Public Health Emergency

From <https://rosap.ntl.bts.gov/view/dot/50941>

National Centre for Health Statistics

(NCHS)

<https://www.cdc.gov/nchs/index.htm>

SAMHSA

Key Substance Use and Mental Health Indicators in the United States: Results from the 2020 National Survey on Drug Use and Health

<https://www.samhsa.gov/data/sites/default/files/reports/rpt35325/NSDUHFFRPDFWHTMLFiles2020/2020NSDUHFFR1PDFW102121.pdf>
